# Supplementary material
Source: PubMed Central journal article supplement (PMC3985661)

## Supplementary Material:

### PARP1-TDP1 coupling for the repair of topoisomerase I-induced DNA damage

Benu Brata Das<sup>1,2\*</sup>, Shar-yin N. Huang<sup>1</sup>, Junko Murai<sup>1</sup>, Ishita Rehman<sup>2</sup>, Jean-Christophe Amé<sup>3</sup>, Souvik Sengupta<sup>2</sup>, Subhendu K Das<sup>2</sup>, Papiya Majumdar<sup>2</sup>, Hongliang Zhang<sup>1</sup>, Denis Biard<sup>4</sup>, Hemanta K Majumder<sup>5</sup>, Valérie Schreiber<sup>3</sup> and Yves Pommier<sup>1,\*</sup>

<sup>1</sup>Laboratory of Molecular Pharmacology, Center for Cancer Research, National Cancer Institute, National Institutes of Health, Bethesda MD 20892-4255, USA. <sup>2</sup>Laboratory of Molecular Biology, Indian Association for the Cultivation of Science, Jadavpur, Kolkata-700032, India. <sup>3</sup>Biotechnology and Cell Signaling, UMR7242 CNRS, Université de Strasbourg, Laboratory of Excellence Medalis, ESBS, Blvd Sébastien Brant, BP 10413, 67412 Illkirch, France. <sup>4</sup>CEA-DSV-iMETI-SEPIA, BP6, 92265 Fontenay-aux-Roses cedex, France. <sup>5</sup>Laboratory of Molecular Parasitology, Indian Institute of Chemical Biology, Kolkata-700032, India.

\*To whom correspondence should be addressed: Yves Pommier, Phone: (1) 301 496 5944. Fax: (1) 301 402 0752. E-mail: [pommier@nih.gov](mailto:pommier@nih.gov) or Benu Brata Das. Tel +91-33-2473-4971 (ext. 2108). Fax: +91-33-24732805. Email: [pcbhd@iacs.res.in](mailto:pcbhd@iacs.res.in)

**Supplementary Figure 1: SUMOylation-deficient TDP1 (TDP1<sup>K111R</sup>) binds PARP1.** Flag-tagged TDP1 constructs (FLAG-TDP1<sup>WT</sup> or FLAG-TDP1<sup>K111R</sup>) were ectopically expressed in HCT116 cells. After CPT treatment (10  $\mu$ M for 2 h), ectopic TDP1 was immunoprecipitated using anti-Flag antibody and the immune complexes were probed with anti-PARP1 antibody. Both TDP1<sup>K111R</sup> and TDP1<sup>WT</sup> show similar affinity for PARP1. Blots were subsequently stripped and probed with anti-TDP1 antibody.

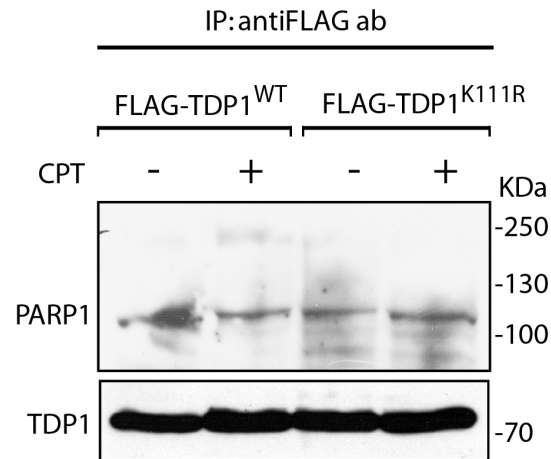

Supplement: supp_gku088_nar-03520-d-2013-File010.pdf [file supp_gku088_nar-03520-d-2013-File010.pdf]
